# Supplementary material for: Cytotoxic Sesterterpenoids from a Sponge Hippospongia sp
Source: PubMed Central journal article supplement (PMC3397461; doi:10.3390/md10050987), 2012-04-27
Supplement: marinedrugs-10-00987-s001.pdf [file marinedrugs-10-00987-s001.pdf]

# Supporting Information

## Cytotoxic Sesterterpenoids from the Sponge *Hippospongia* sp.

Yu-Chia Chang, Shang-Wei Tseng, Li-Lian Liu, Yalan Chou, Yuan-Shing Ho, Mei-Chin Lu and Jui-Hsin Su\*

### Table of Contents

**S1.** Table of Contents

**S2.** <sup>1</sup>H NMR spectrum of **1** in CDCl<sub>3</sub> at 500 MHz.

**S3.** <sup>13</sup>C NMR spectrum of **1** in CDCl<sub>3</sub> at 125 MHz.

**S4.** <sup>1</sup>H NMR spectrum of **2** in CDCl<sub>3</sub> at 500 MHz.

**S5.** <sup>13</sup>C NMR spectrum of **2** in CDCl<sub>3</sub> at 125 MHz.

**S6.** <sup>1</sup>H NMR spectrum of **3** in CDCl<sub>3</sub> at 400 MHz.

**S7.** <sup>13</sup>C NMR spectrum of **3** in CDCl<sub>3</sub> at 100 MHz.

**S8.** <sup>1</sup>H NMR spectrum of **4** in CDCl<sub>3</sub> at 400 MHz.

**S9.** <sup>13</sup>C NMR spectrum of **4** in CDCl<sub>3</sub> at 100 MHz.

**S10.** <sup>1</sup>H NMR spectrum of **5** in CDCl<sub>3</sub> at 400 MHz.

**S11.** <sup>13</sup>C NMR spectrum of **5** in CDCl<sub>3</sub> at 100 MHz.

**S12.** <sup>1</sup>H NMR spectrum of **6** in CDCl<sub>3</sub> at 500 MHz.

**S13.** <sup>13</sup>C NMR spectrum of **6** in CDCl<sub>3</sub> at 125 MHz.

**S14.** <sup>1</sup>H NMR spectrum of **7** in CDCl<sub>3</sub> at 400 MHz.

**S15.** <sup>13</sup>C NMR spectrum of **7** in CDCl<sub>3</sub> at 100 MHz.

**S16.** <sup>1</sup>H NMR spectrum of **8** in CDCl<sub>3</sub> at 500 MHz.

**S17.** <sup>13</sup>C NMR spectrum of **8** in CDCl<sub>3</sub> at 125 MHz.

**S1.**

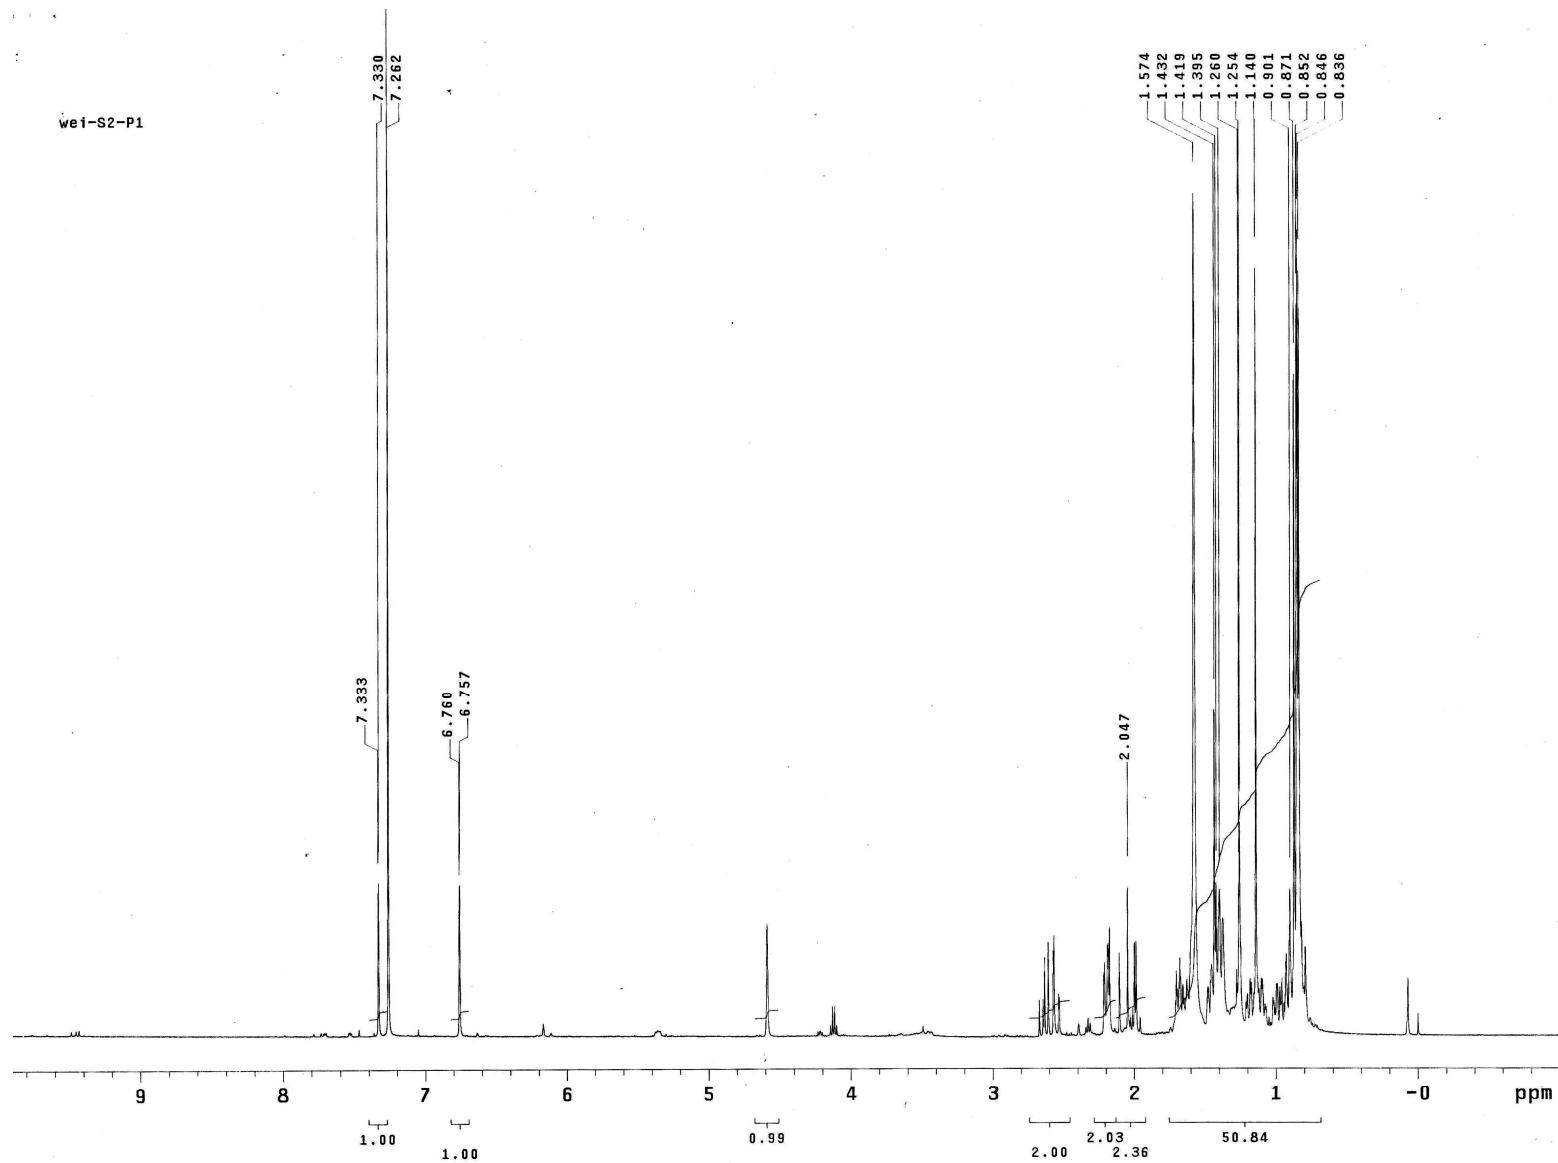

S2.  $^1\text{H}$  NMR spectrum of **1** in  $\text{CDCl}_3$  at 500 MHz.

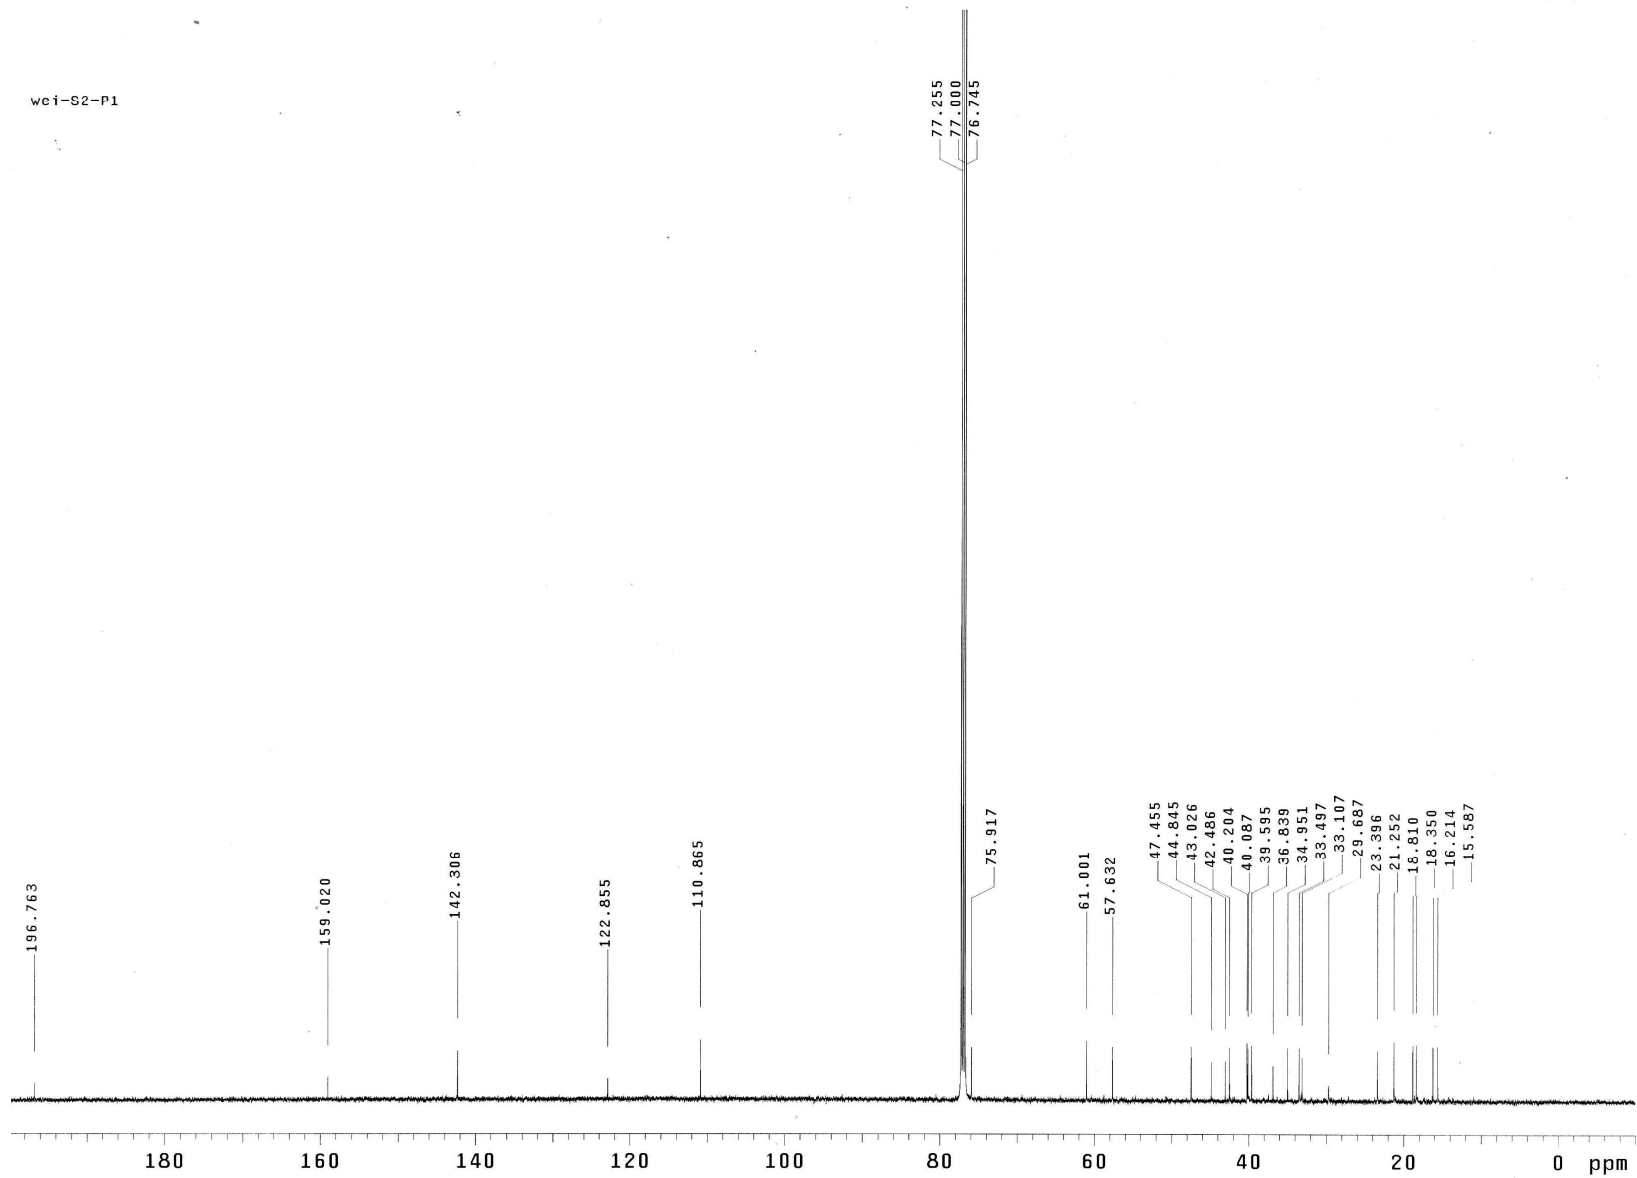

S3.  $^{13}\text{C}$  NMR spectrum of **1** in  $\text{CDCl}_3$  at 125 MHz.

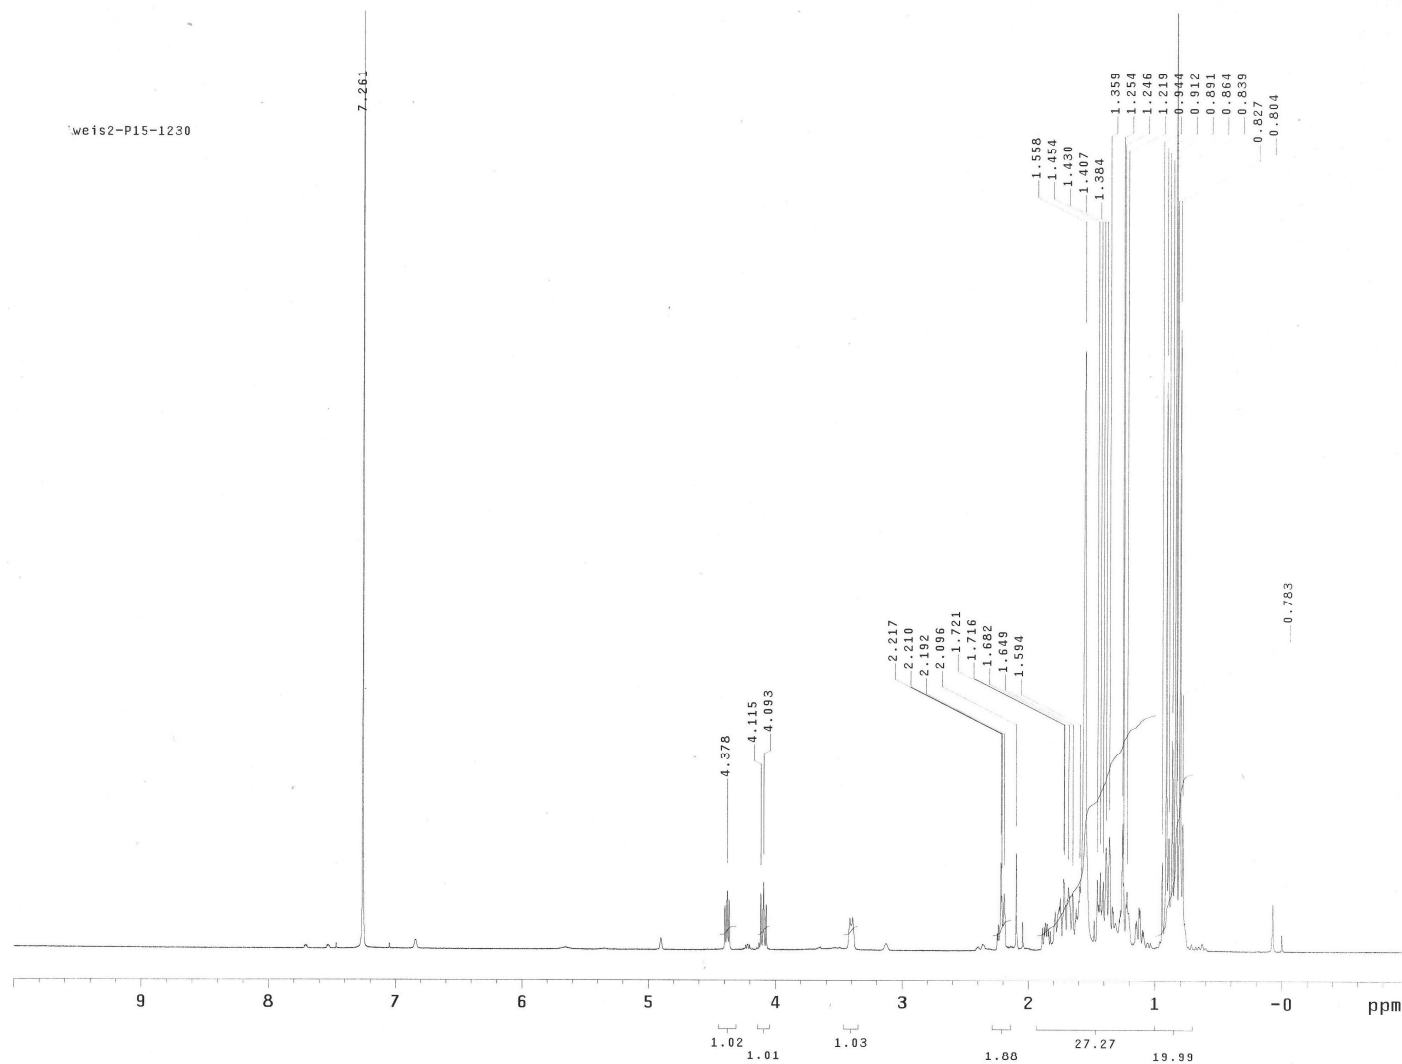

**S4.**  $^1\text{H}$  NMR spectrum of **2** in  $\text{CDCl}_3$  at 500 MHz.

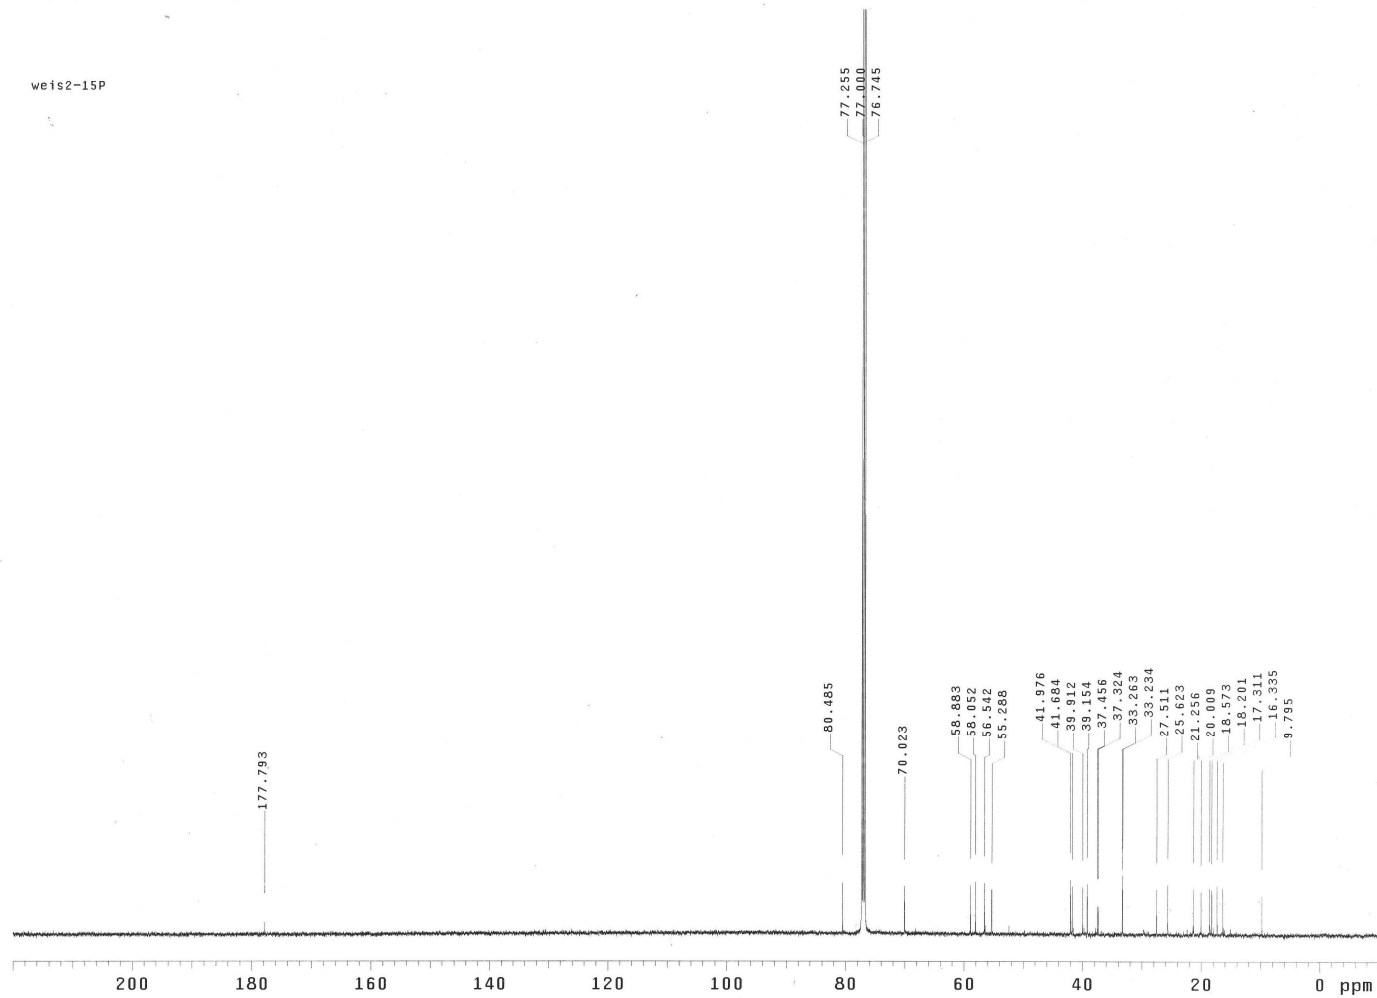

S5.  $^{13}\text{C}$  NMR spectrum of **2** in  $\text{CDCl}_3$  at 125 MHz.

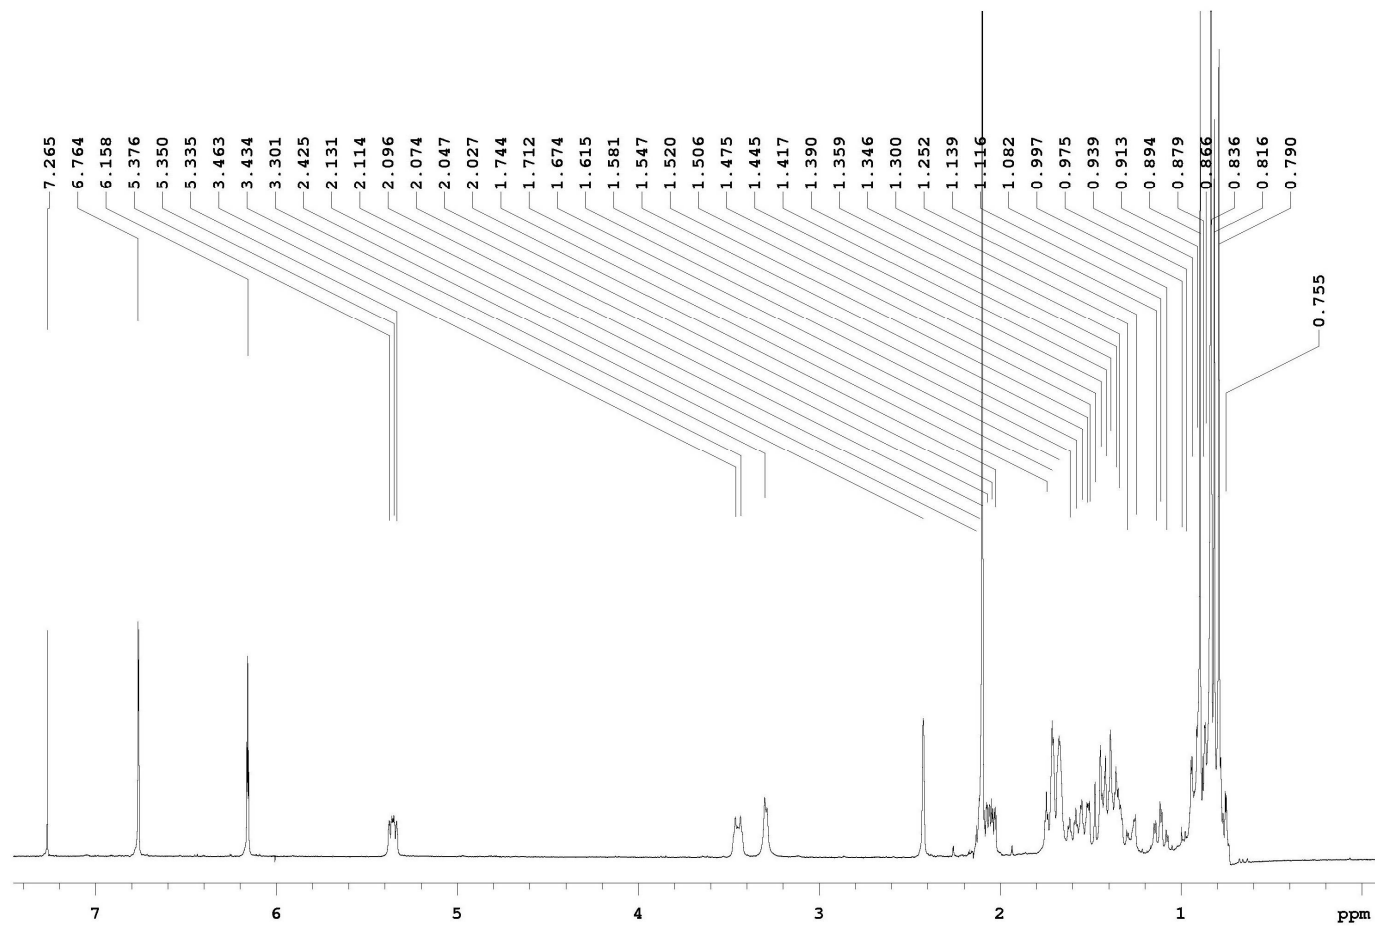

S6.  $^1\text{H}$  NMR spectrum of **3** in  $\text{CDCl}_3$  at 400 MHz.

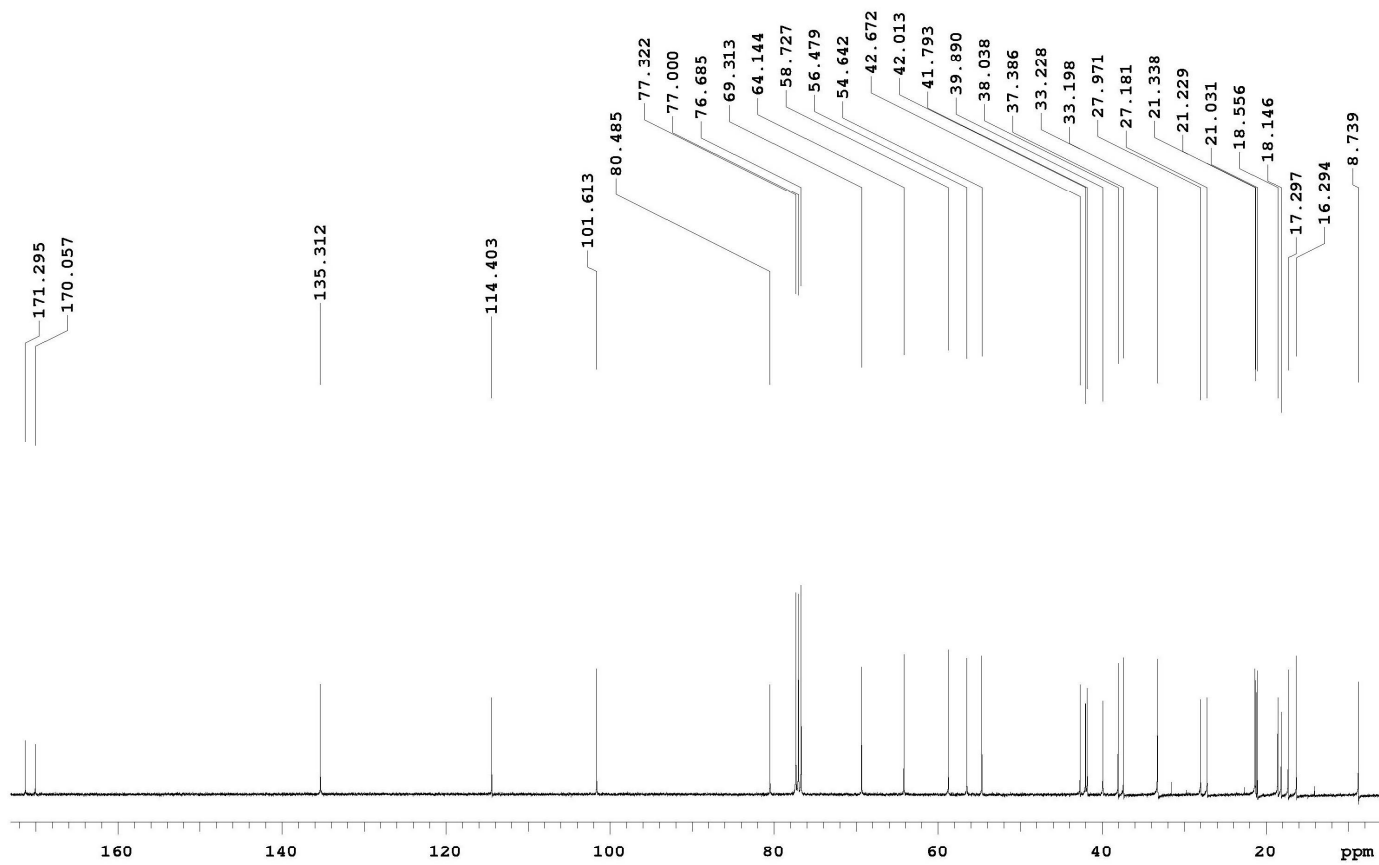

S7. <sup>13</sup>C NMR spectrum of **3** in CDCl<sub>3</sub> at 100 MHz.

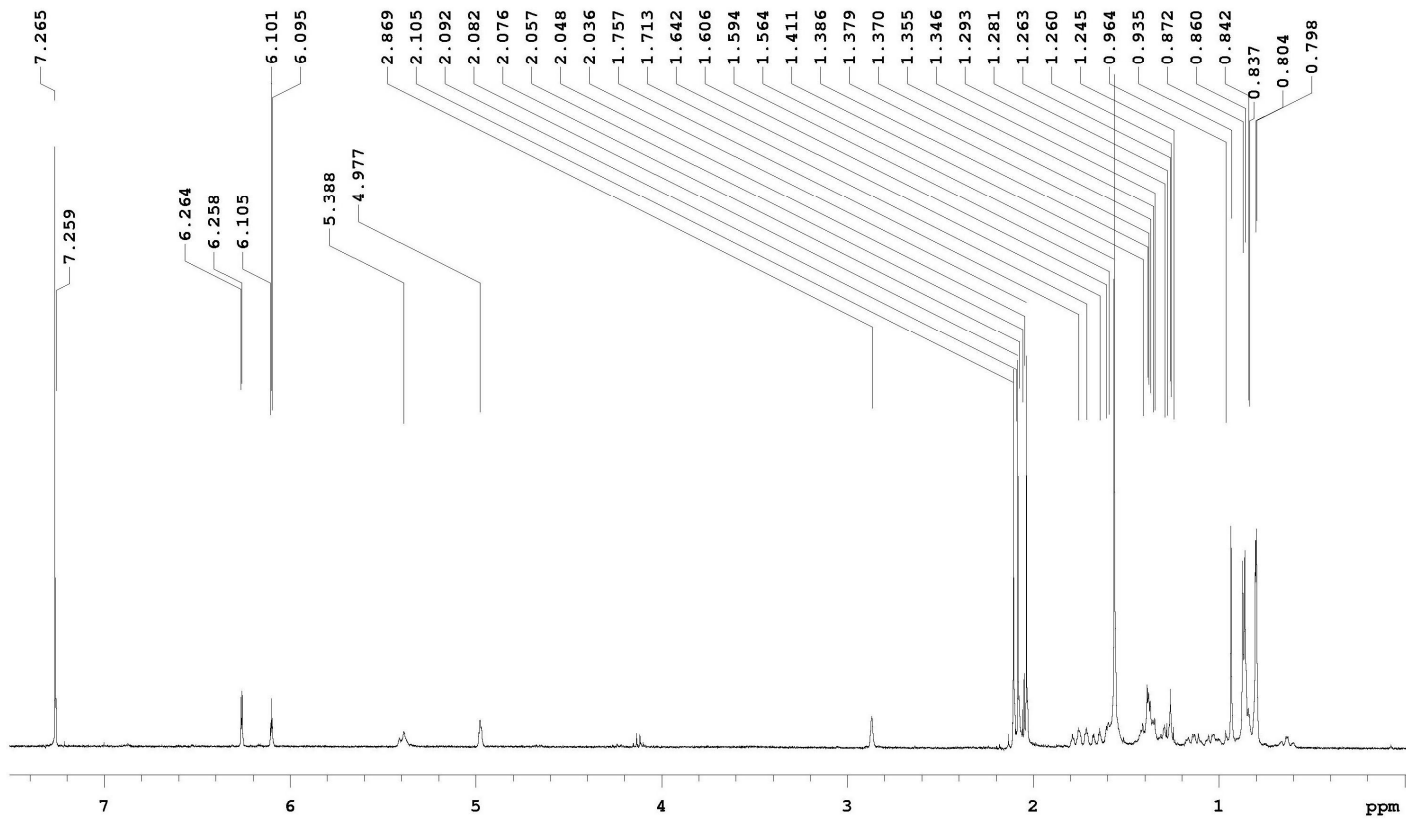

**S8.**  $^1\text{H}$  NMR spectrum of **4** in  $\text{CDCl}_3$  at 400 MHz.



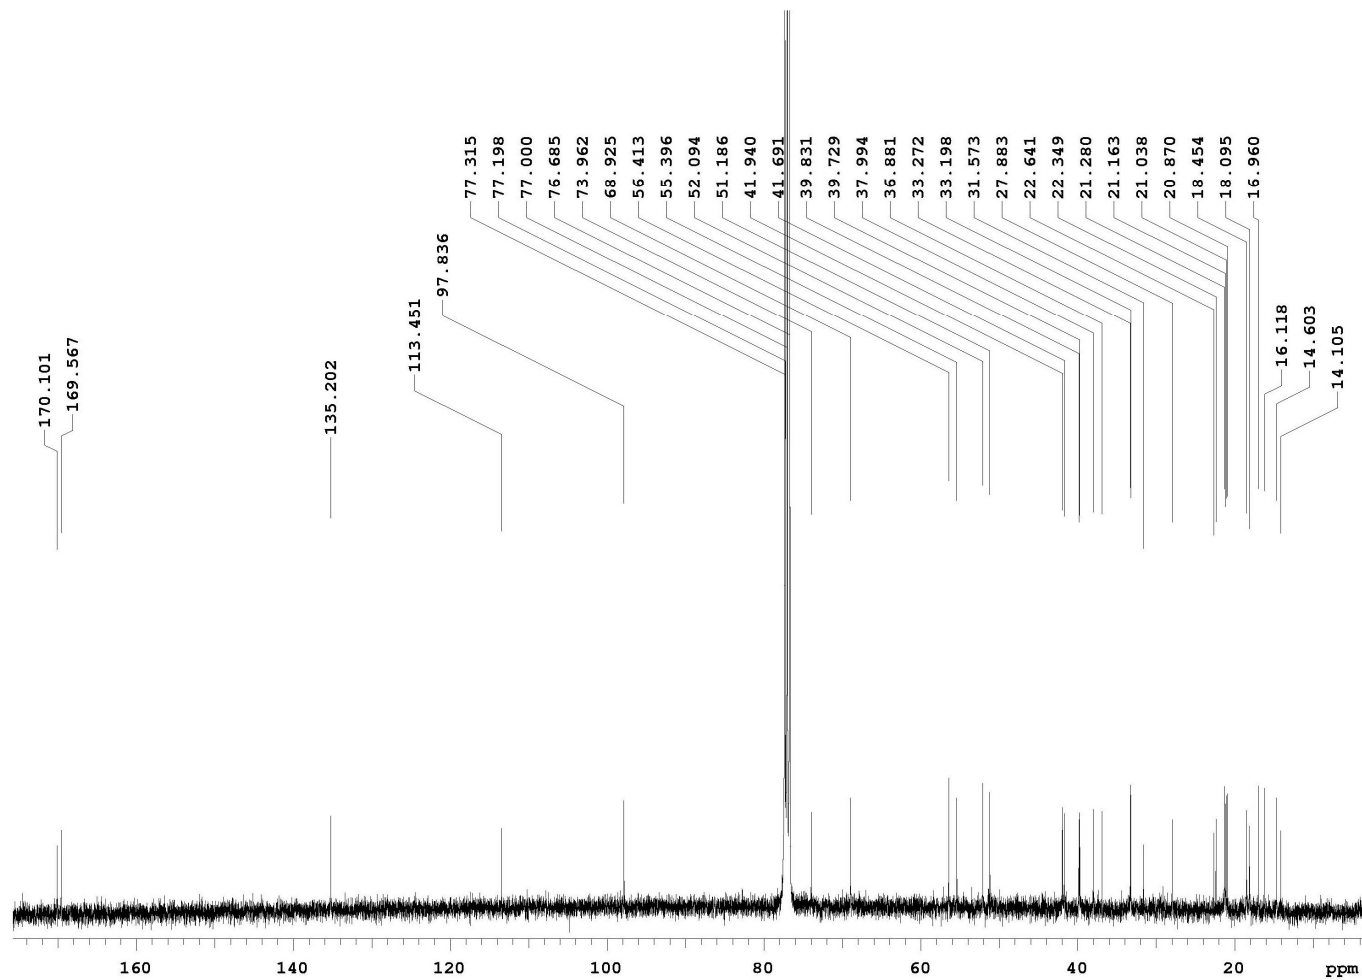

S9. <sup>13</sup>C NMR spectrum of **4** in CDCl<sub>3</sub> at 100 MHz.

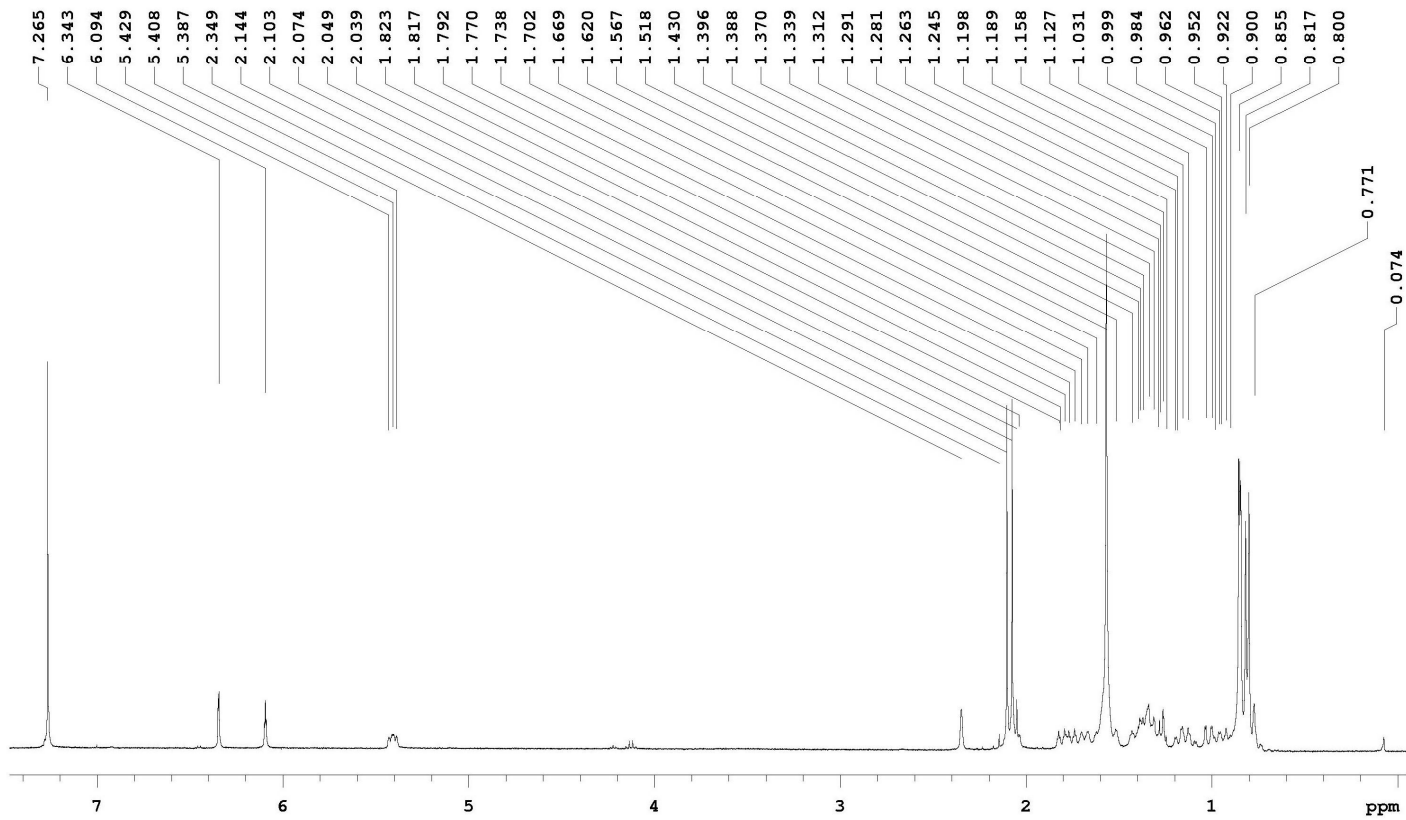

S10.  $^1\text{H}$  NMR spectrum of **5** in  $\text{CDCl}_3$  at 400 MHz.

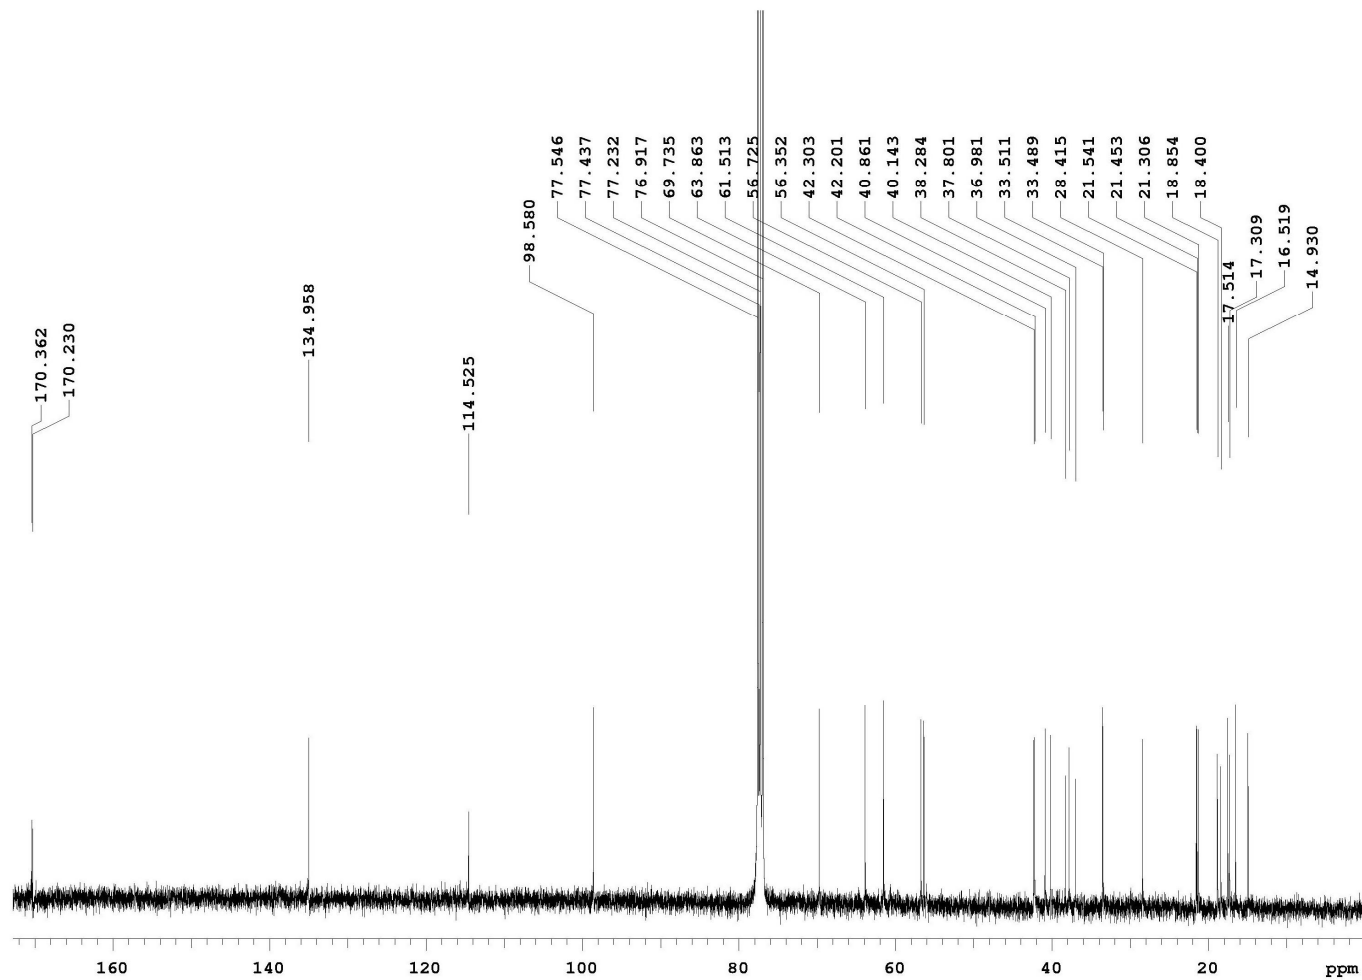

**S11.** <sup>13</sup>C NMR spectrum of **5** in CDCl<sub>3</sub> at 100 MHz.

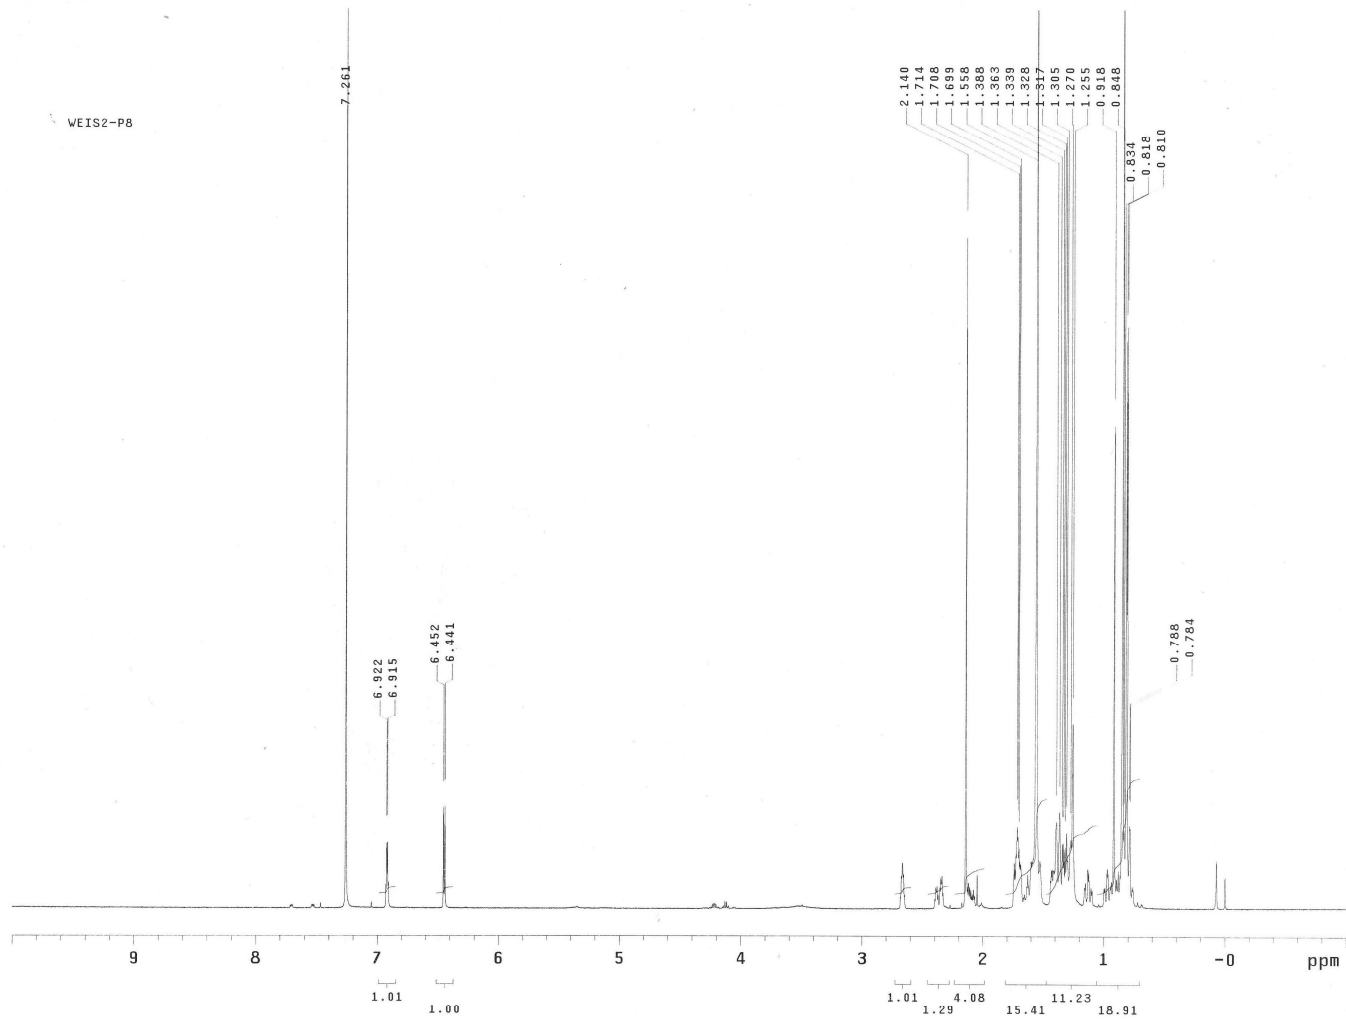

S12.  $^1\text{H}$  NMR spectrum of **6** in  $\text{CDCl}_3$  at 500 MHz.

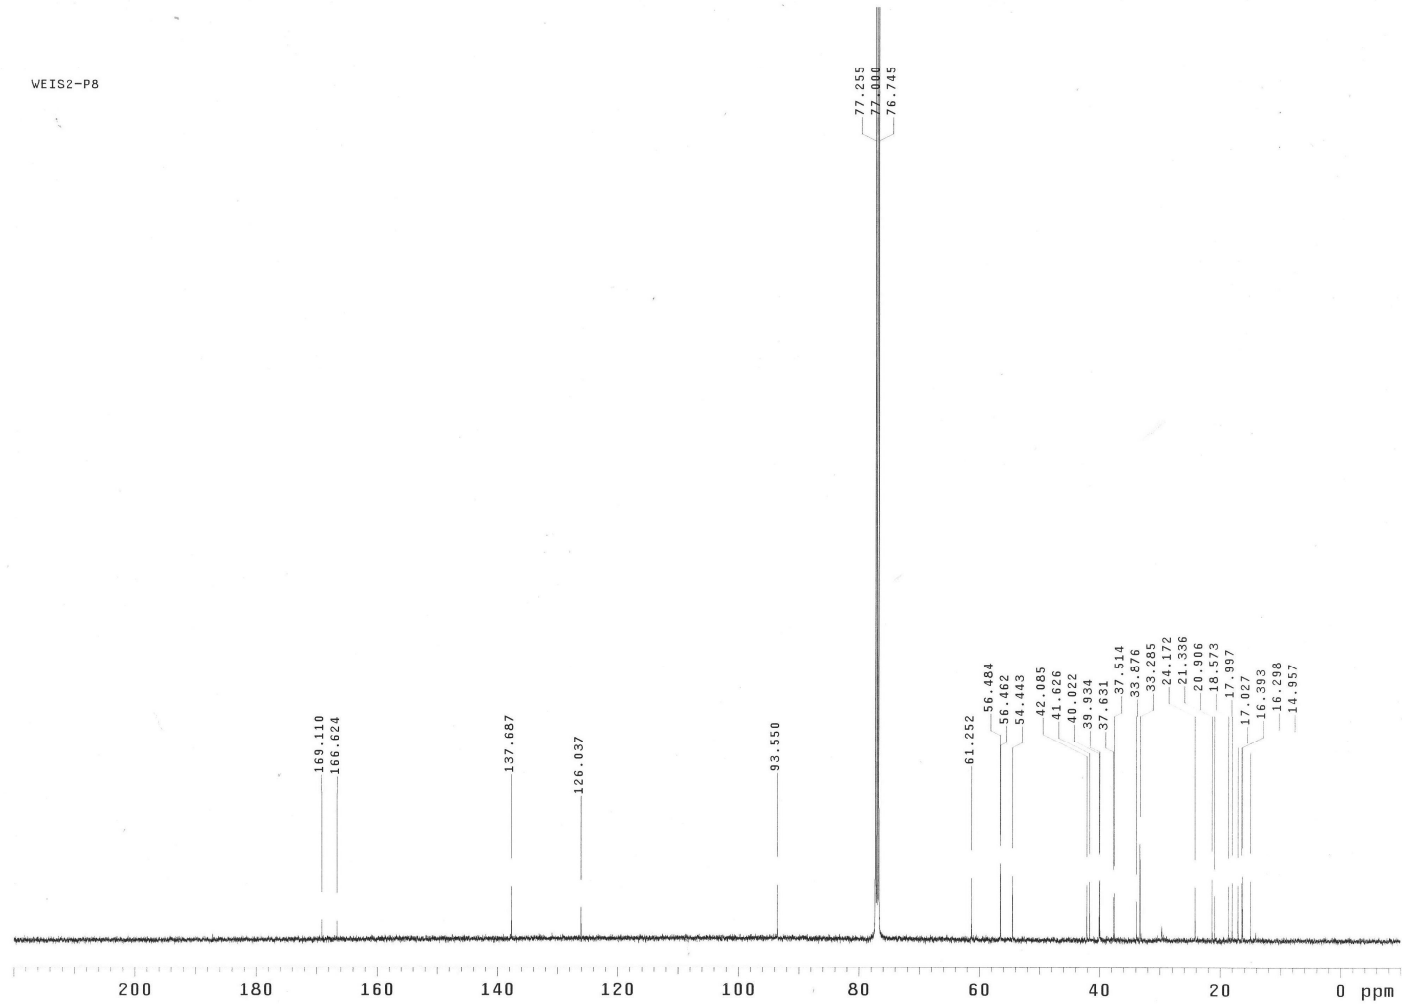

**S13.**  $^{13}\text{C}$  NMR spectrum of **6** in  $\text{CDCl}_3$  at 125 MHz.

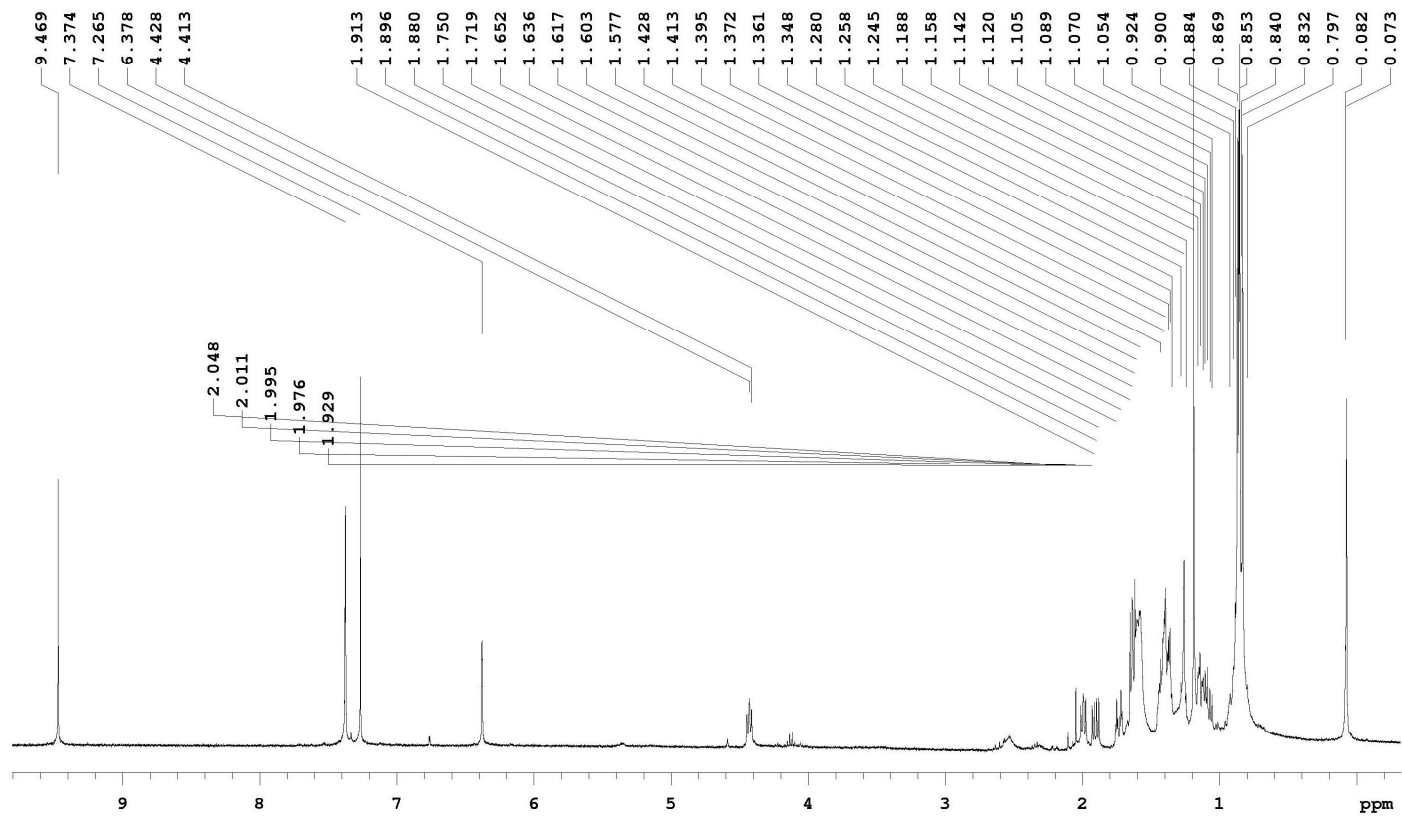

S14.  $^1\text{H}$  NMR spectrum of **7** in  $\text{CDCl}_3$  at 400 MHz.

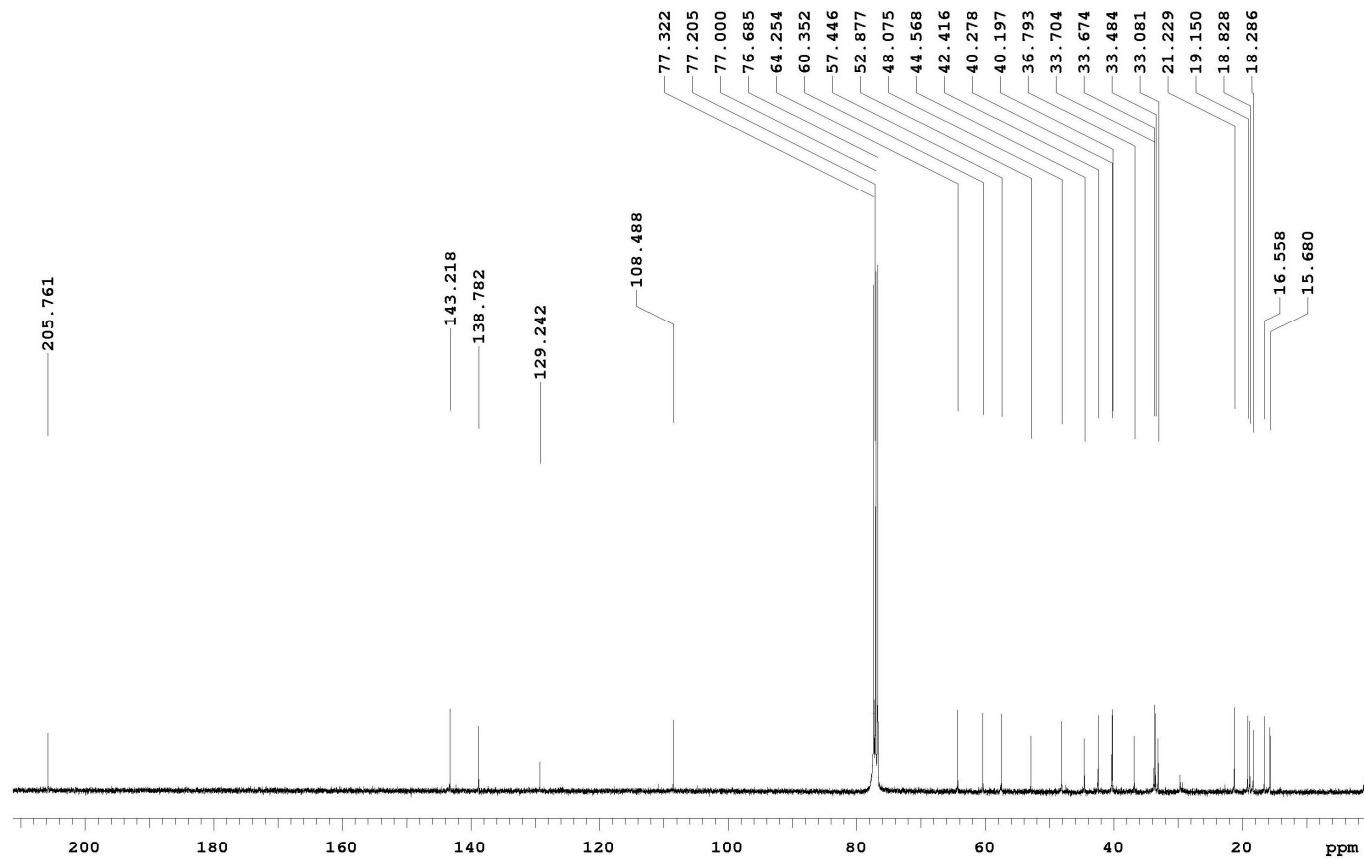

**S15.** <sup>13</sup>C NMR spectrum of **7** in CDCl<sub>3</sub> at 100 MHz.

WEIS2-1A-28-32

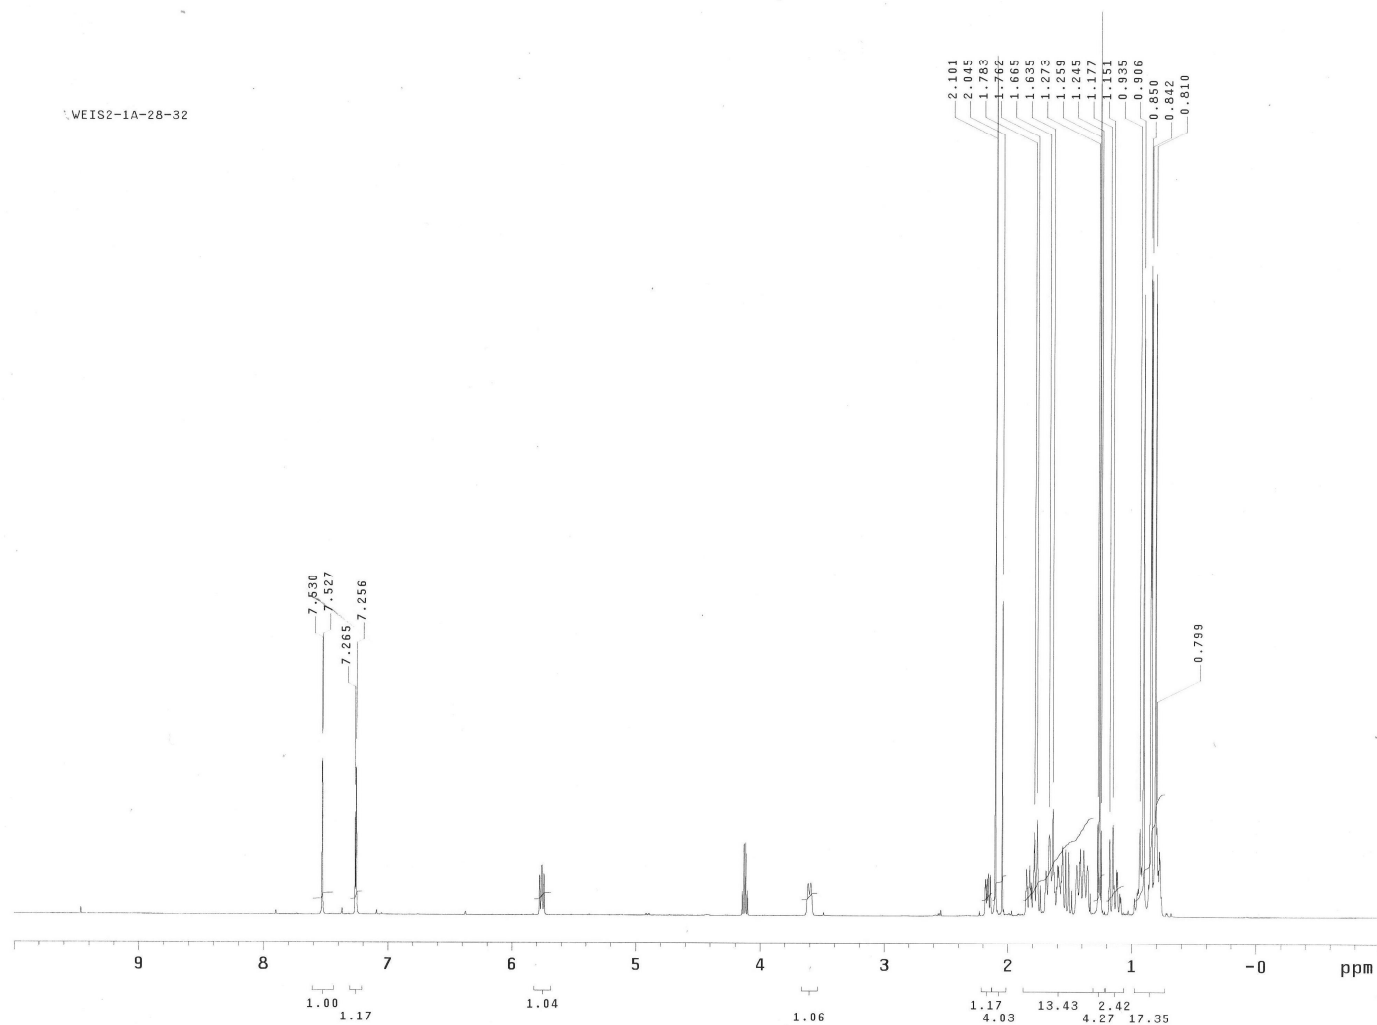

S16.  $^1\text{H}$  NMR spectrum of **8** in  $\text{CDCl}_3$  at 500 MHz.



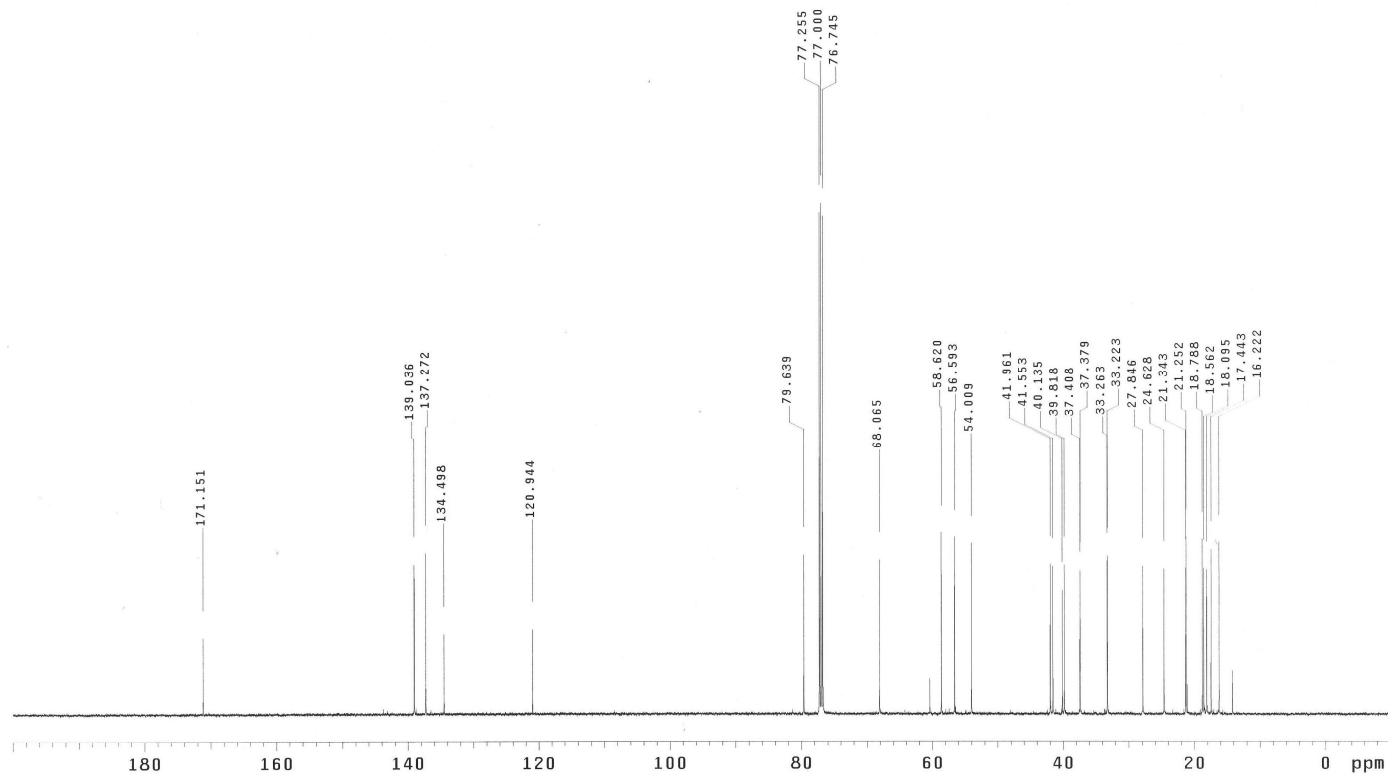

**S17.** <sup>13</sup>C NMR spectrum of **8** in CDCl<sub>3</sub> at 125 MHz.
